# Supplementary material for: The Global, Regional, and National Burden of Endometriosis in 204 Countries and Territories, 1990–2021: Results from the Global Burden of Disease Study 2021
Source: Research Square preprint supplement (doi:10.21203/rs.3.rs-6763472/v1), 2025-07-24
Supplement: Supplementary file 1 [file 5961b6e6cf42af2f245e51a7.xlsx]

## Sheet: Table1
	Prevalence (95% UI)			DALYs (95% UI)
Location	No, in millions (95% UI)	ASRs per 100000(95% UI)	Percentage change in ASRs from1990to2021	No, in thousands (95% UI)	ASRs per 100000(95% UI)	Percentage change in ASRs from1990to2021
Global	22.3 (15.5,30.4)	275.6 (192.4,377.9)	-26.2 (-28.5,-24)	2049.5 (1195.2,3134)	25.4 (14.8,38.8)	-26.1 (-28.6,-23.9)
High-income Asia Pacific	0.5 (0.4,0.7)	310.9 (224.3,408.4)	-15.6 (-23.1,-6.9)	50.5 (30.8,76.6)	28.8 (17.9,42.8)	-15.6 (-23,-6)
High-income North America	0.6 (0.4,0.8)	165.9 (123.5,214.5)	-35 (-46,-21.4)	54.2 (33.5,83.2)	15.1 (9.4,23.2)	-35.4 (-46.5,-22.2)
Western Europe	0.9 (0.7,1.2)	228.6 (164.5,306.8)	-4.9 (-9.8,1.1)	82.7 (49,128.2)	21 (12.4,32.2)	-5 (-10.5,1.5)
Australasia	0.1 (0.1,0.1)	269.4 (189.9,369.6)	-12.7 (-18.1,-6.5)	7.4 (4.4,11.7)	24.7 (14.6,38.8)	-12.3 (-21.9,-2.1)
Andean Latin America	0.2 (0.1,0.2)	218.6 (150,303.8)	-32.7 (-36.8,-28.1)	14.3 (8.2,22.1)	20.1 (11.5,31.3)	-32.8 (-38.4,-25.4)
Tropical Latin America	0.6 (0.4,0.9)	251.4 (174.2,348.2)	-18.9 (-26.3,-9.4)	57.3 (33.4,86.7)	23.1 (13.4,35.1)	-18.5 (-26.6,-8.8)
Central Latin America	0.6 (0.4,0.8)	213 (147.1,297.5)	-33.6 (-35.6,-31.7)	53 (30.6,81.8)	19.6 (11.3,30.3)	-33.8 (-36.4,-31.3)
Southern Latin America	0.2 (0.1,0.2)	220 (162.5,284.6)	-16.4 (-23.5,-7.5)	14.6 (8.8,22.3)	20.2 (12.2,30.9)	-16.6 (-25.4,-6.2)
Caribbean	0.1 (0.1,0.2)	228 (154.7,320.4)	-26.2 (-29.8,-23.2)	10.3 (5.9,15.8)	20.9 (12,32)	-26.3 (-31.6,-21.1)
Central Europe	0.3 (0.2,0.4)	235.4 (166.6,327.1)	-9.9 (-12.2,-7.5)	24 (14.3,38.2)	21.8 (12.8,33.8)	-10 (-13.1,-6.9)
Eastern Europe	0.9 (0.6,1.2)	431.6 (300.8,595.8)	-2.7 (-4.8,-0.4)	81.2 (47,127)	39.8 (23.2,61.7)	-2.8 (-5.7,0.5)
Central Asia	0.3 (0.2,0.4)	276.3 (193.1,382.5)	-21.9 (-25.6,-17.7)	25.8 (15.3,39.9)	25.6 (15.3,39.5)	-22 (-26.6,-17.4)
North Africa and Middle East	2.2 (1.5,3.1)	326.1 (227.1,457)	-33.4 (-36.3,-30.8)	200.8 (116.4,307)	29.8 (17.3,45.4)	-33.4 (-36.6,-30.3)
South Asia	5.9 (4.1,8.2)	291.4 (202.5,405.9)	-39.7 (-42.5,-37.2)	537.2 (312.9,830.4)	26.7 (15.6,40.9)	-39.4 (-42.7,-36.7)
Southeast Asia	2.4 (1.7,3.3)	317.1 (224.8,432.6)	-25.4 (-27.3,-23.2)	225.2 (132.9,352.2)	29.5 (17.4,46)	-25.1 (-27.7,-22.5)
East Asia	3.1 (2.3,4.1)	197.5 (141.2,261.3)	-34.9 (-39.9,-28.7)	290.1 (170.1,459.9)	18.4 (11,29)	-34.6 (-39.7,-27.8)
Oceania	0.1 (0,0.1)	491.9 (331.9,681.6)	-15.8 (-21.9,-10.6)	6.3 (3.5,9.9)	45.2 (25.7,72)	-15.6 (-21.9,-9.3)
Western Sub-Saharan Africa	1.6 (1.1,2.3)	375.2 (255.8,511.8)	-25.7 (-28.3,-23.1)	148.7 (84.5,229.3)	34.3 (19.7,53.1)	-25.3 (-28,-22.3)
Eastern Sub-Saharan Africa	1.1 (0.8,1.6)	293.6 (198.3,409)	-38 (-40.1,-36.1)	105.6 (60,162.9)	26.9 (15.2,41.6)	-37.6 (-40.1,-35.1)
Central Sub-Saharan Africa	0.4 (0.3,0.6)	328.9 (226,458)	-38.8 (-42.8,-34.7)	37 (21.1,58)	30 (17.1,46)	-38.3 (-43.6,-33)
Southern Sub-Saharan Africa	0.3 (0.2,0.4)	297.9 (203.3,413.5)	-23.9 (-26.5,-21.1)	23.5 (13.4,36.6)	27 (15.5,41.8)	-24.5 (-27.9,-20.8)
